# Supplementary material
Source: PubMed Central journal article supplement (PMC8733744)
Supplement: mmc1.pdf [file mmc1.pdf]

# **Effect of Crizanlizumab, a P-selectin Inhibitor, in COVID-19: A Placebo-Controlled, Randomized Trial**

## **Supplemental Appendix**

Page 2. Supplemental Table S1. Data and Safety Monitoring Board (DSMB)

Page 3. Supplemental Table S2. Inclusion and Exclusion Criteria

Page 4. Supplemental Table S3. Sources of commercially available immunoassays used in the study.

Page 5. Supplemental Table S4. WHO Clinical Progression Scale

## **Supplemental Table S1. Data and Safety Monitoring Board (DSMB)**

Mark Creager, MD (Chair of DSMB), Anna Gundlach Huber Professor in Medicine, Geisel School of Medicine at Dartmouth, Director of the Heart and Vascular Center at Dartmouth-Hitchcock Medical Center, Dartmouth, NH

Paul E. Sax, MD, Professor of Medicine, Clinical Director, Infectious Disease Clinic, Harvard Medical School, Boston, MA

Julie Kanter, MD, Associate Professor of Medicine; Co-Director of the Comprehensive Sickle Cell Center, University of Alabama at Birmingham, AL

### Supplemental Table S2. Inclusion and Exclusion Criteria

|                               |                                                                                                                                                                                                                                                                                                                                                                                                                                                                                                                                                                                                                                                                                                                                                                                                                                                                                                                                                                                   |
|-------------------------------|-----------------------------------------------------------------------------------------------------------------------------------------------------------------------------------------------------------------------------------------------------------------------------------------------------------------------------------------------------------------------------------------------------------------------------------------------------------------------------------------------------------------------------------------------------------------------------------------------------------------------------------------------------------------------------------------------------------------------------------------------------------------------------------------------------------------------------------------------------------------------------------------------------------------------------------------------------------------------------------|
| <b>Inclusion criteria</b>     | <ol style="list-style-type: none"><li>1. Willing to provide written informed consent.</li><li>2. Willing to comply with all study procedures and be available for the duration of the study</li><li>3. Male or female <math>\geq 18</math> years of age</li><li>4. SARS-CoV-2 infection (COVID-19) within the past 10 d documented by laboratory test (NAT or RT-PCR)</li><li>5. Currently hospitalized</li><li>6. Symptoms of acute respiratory infection (at least one of the following: cough, fever <math>&gt; 37.5^{\circ}\text{C}</math>, dyspnea, sore throat, anosmia) within past 10 days</li><li>7. Radiographic evidence of pulmonary infiltrates</li><li>8. Requiring supplemental oxygen or the peripheral capillary oxygenation saturation (<math>\text{SpO}_2</math>) <math>&lt; 94\%</math> on room air at screening.</li><li>9. Elevated D-Dimer <math>&gt; 0.49</math> mg/L</li><li>10. Negative pregnancy test for females of childbearing potential</li></ol> |
| <b>Key Exclusion criteria</b> | <ol style="list-style-type: none"><li>1. Use of home oxygen at baseline</li><li>2. Current use of mechanical ventilation</li><li>3. Inability to provide informed consent</li><li>4. Do Not Intubate status</li><li>5. Prisoner or incarcerated status</li><li>6. Pregnant or nursing (lactating) women.</li><li>7. Participation in other interventional drug trials for COVID-19 (emergency use or unblinded use of convalescent plasma is permitted).</li><li>8. INR <math>&gt; 3</math> or aPTT <math>&gt; 60</math></li></ol>                                                                                                                                                                                                                                                                                                                                                                                                                                                |

**Supplemental Table S3. Sources of commercially available immunoassays used in the study.**

| <b>Supplier</b>                        | <b>Analyte</b>                |
|----------------------------------------|-------------------------------|
| R&D Systems (Minneapolis, MN)          | Soluble P-selectin            |
|                                        | IL-6                          |
|                                        | TNFalpha                      |
| Abcam (Cambridge, MA)                  | VWF                           |
|                                        | Fibrinogen                    |
|                                        | Thrombin-antithrombin complex |
| Lifespan Biosciences (Seattle, WA)     | NT-proBNP                     |
|                                        | Factor VIII                   |
|                                        | Prothrombin fragment 1.2      |
|                                        | Plasmin-antiplasmin complex   |
| Roche Diagnostics (Indianapolis, IN)   | Troponin T                    |
| Meso Scale Diagnostics (Rockville, MD) | CCL2                          |
|                                        | CCL3                          |
|                                        | CCL4                          |
|                                        | CCL13                         |
|                                        | CCL22                         |
|                                        | CCL24                         |
|                                        | CCL26                         |
|                                        | CXCL10                        |
|                                        | IL-2                          |
|                                        | IL-4                          |
|                                        | IL-8                          |
|                                        | IL-10                         |
|                                        | IL-13                         |
|                                        | Serum amyloid A               |
|                                        | VCAM-1                        |
|                                        | ICAM-1                        |

**Supplemental Table S4. WHO Clinical Progression Scale.** WHO clinical scale for severity of COVID-19.

| Score | Descriptor                                                                         |
|-------|------------------------------------------------------------------------------------|
| 0     | Uninfected; no viral RNA detected                                                  |
| 1     | Asymptomatic; viral RNA detected                                                   |
| 2     | Symptomatic; independent                                                           |
| 3     | Symptomatic; assistance needed                                                     |
| 4     | Hospitalized; no oxygen therapy                                                    |
| 5     | Hospitalized; oxygen by mask or nasal prongs                                       |
| 6     | Hospitalized; oxygen by NIV or high flow                                           |
| 7     | Intubation and mechanical ventilation, $pO_2/FiO_2 > 150$ or $SpO_2/FiO_2 > 200$   |
| 8     | Mechanical ventilation, $pO_2/FiO_2 < 150$ ( $SpO_2/FiO_2 < 200$ ) or vasopressors |
| 9     | Mechanical ventilation $pO_2/FiO_2 < 150$ and vasopressors, dialysis, or ECMO      |
| 10    | Dead                                                                               |
